# Supplementary material
Source: publisher figshare collection journal article supplement (https://sage.figshare.com/ndownloader/files/13612289)

**Supplementary Table S1. List of all 65 measures of the test battery taken into account for the statistical analysis.** Column A, “No.” = Variable number; Column B, “Subject Area” = Subject area of variable: Matching, Hearing, Cognition, Health, Socioeconomic status, or Technology commitment and usage habits of media devices; Column C, “Variable” = Variable name and in case of a categorical variable possible response categories are listed; Column D, “Source” = Test or topic of self-reports; Column E, “Description” = More detailed variable information, in case of self-reports corresponding questions are presented.

| No. | Subject Area | Variable                                                                                                                                               | Source                                                     | Description                                                                                      |
|-----|--------------|--------------------------------------------------------------------------------------------------------------------------------------------------------|------------------------------------------------------------|--------------------------------------------------------------------------------------------------|
| 1   | Matching     | <i>PTA</i>                                                                                                                                             | Audiogram                                                  | Pure-tone average in dB HL (better ear: 0.5,1,2,4 kHz)                                           |
| 2   |              | <i>Age</i>                                                                                                                                             | Self-reports: demographics                                 | Age in years (year and month of birth at the time of answering the question)                     |
| 3   |              | <i>Sex</i><br><br>Male<br>Female                                                                                                                       | Self-reports: demographics                                 | Gender                                                                                           |
| 4   | Hearing      | <i>50%-SRT</i>                                                                                                                                         | Goettingen sentence test                                   | Signal-to-noise ratio for 50% speech intelligibility                                             |
| 5   |              | <i>Hearing loss detected</i><br><br>Yes<br>No                                                                                                          | Self-reports: hearing history and demands on sound quality | Have you, a doctor, relatives or friends determined that you have a hearing problem?             |
| 6   |              | <i>Duration of hearing loss</i><br><br>No hearing problems<br><1 year<br>1 to 3 years<br>3 to 5 years<br>5 to 10 years<br>11 to 20 years<br>≥ 20 years | Self-reports: hearing history and demands on sound quality | Since when do you have hearing problems?                                                         |
| 7   |              | <i>Subjective hearing problems in quiet</i><br><br>No hearing problems                                                                                 | Self-reports: hearing history and demands on sound quality | How pronounced are your hearing problems in a quiet environment? (for HA-U: without hearing aid) |

|    |  |                                                                                                                                    |                                                            |                                                                                                  |
|----|--|------------------------------------------------------------------------------------------------------------------------------------|------------------------------------------------------------|--------------------------------------------------------------------------------------------------|
|    |  | Very slight<br>Slight<br>Medium<br>Strong<br>Very strong                                                                           |                                                            |                                                                                                  |
| 8  |  | <i>Subjective hearing problems in noise</i><br><br>No hearing problems<br>Very slight<br>Slight<br>Medium<br>Strong<br>Very strong | Self-reports: hearing history and demands on sound quality | How pronounced are your hearing problems in a noisy environment? (for HA-U: without hearing aid) |
| 9  |  | <i>Demand on sound quality of audio devices</i><br><br>Not at all<br>Hardly<br>A bit<br>Rather<br>Very                             | Self-reports: hearing history and demands on sound quality | How demanding are you regarding sound quality of audio devices?                                  |
| 10 |  | <i>Current hearing aid use</i><br><br>Yes<br>No                                                                                    | Self-reports: usage of hearing aids                        | Currently using hearing aids?                                                                    |
| 11 |  | <i>Duration of hearing aid use</i>                                                                                                 | Self-reports: usage of hearing aids                        | For how many years do you use or have you used hearing aids?                                     |
| 12 |  | <i>Daily duration of hearing aid use</i><br><br>Not at all<br>< 1h<br>1-4h<br>4-8h<br>> 8h                                         | Self-reports: usage of hearing aids                        | Hearing aid worn daily for how many hours in last 14 days?                                       |

|    |           |                                                                                                                                       |                                     |                                                                                                                               |
|----|-----------|---------------------------------------------------------------------------------------------------------------------------------------|-------------------------------------|-------------------------------------------------------------------------------------------------------------------------------|
| 13 |           | <i>One- or two-sided hearing aid</i><br><br>One-sided<br>Two-sided                                                                    | Self-reports: usage of hearing aids | <i>Do you have a one- or two-sided hearing aid?</i>                                                                           |
| 14 | Cognition | <i>Verbal intelligence</i>                                                                                                            | German vocabulary test              | Raw score in points                                                                                                           |
| 15 |           | <i>Wordlist</i>                                                                                                                       | DemTect                             | Raw score in points                                                                                                           |
| 16 |           | <i>Semantic verbal fluency</i>                                                                                                        | DemTect                             | Raw score in points                                                                                                           |
| 17 |           | <i>Number transcoding</i>                                                                                                             | DemTect                             | Raw score in points                                                                                                           |
| 18 |           | <i>Digits span reverse</i>                                                                                                            | DemTect                             | Raw score in points                                                                                                           |
| 19 |           | <i>Wordlist delayed recall</i>                                                                                                        | DemTect                             | Raw score in points                                                                                                           |
| 20 |           | <i>Cognitive sum score</i>                                                                                                            | DemTect                             | Transformed total score based on variables no. 15 – 19 (Kalbe et al., 2004)                                                   |
| 21 | Health    | <i>State of health in general</i><br><br>Excellent<br>Very good<br>Good<br>Not so well<br>Bad                                         | Self-reports: SF-12                 | How would you describe your state of health in general?                                                                       |
| 22 |           | <i>Impairment at vacuum cleaning</i><br><br>Yes, strongly impaired<br>Yes, a little impaired<br>No, not impaired at all               | Self-reports: SF-12                 | Are you impaired at moderate activities by current health status (e.g., vacuum cleaning, playing golf) and if yes how strong? |
| 23 |           | <i>Impairment at taking several sets of stairs</i><br><br>Yes, strongly impaired<br>Yes, a little impaired<br>No, not impaired at all | Self-reports: SF-12                 | Are you impaired at taking several sets of stairs by current health status?                                                   |
| 24 |           | <i>Less accomplished due to physical health</i>                                                                                       | Self-reports: SF-12                 | Due to physical health less accomplished than intended in last 4 weeks?                                                       |

|    |  |                                                                                                |                     |                                                                                  |
|----|--|------------------------------------------------------------------------------------------------|---------------------|----------------------------------------------------------------------------------|
|    |  | Yes<br>No                                                                                      |                     |                                                                                  |
| 25 |  | <i>Doing only certain things<br/>due to physical health</i><br><br>Yes<br>No                   | Self-reports: SF-12 | Due to physical health only able to do certain things in last 4 weeks?           |
| 26 |  | <i>Less accomplished due to<br/>mental health</i><br><br>Yes<br>No                             | Self-reports: SF-12 | Due to mental health less accomplished than intended in last 4 weeks?            |
| 27 |  | <i>Less accurate due to mental<br/>health</i><br><br>Yes<br>No                                 | Self-reports: SF-12 | Due to mental health not able to do things as accurate as usual in last 4 weeks? |
| 28 |  | <i>Influence of pain</i><br><br>Not at all<br>A little<br>Moderate<br>Quite<br>A lot           | Self-reports: SF-12 | To what extent has pain impaired everyday activities in last 4 weeks?            |
| 29 |  | <i>Calm and relaxed</i><br><br>Always<br>Mostly<br>Quite often<br>Sometimes<br>Rarely<br>Never | Self-reports: SF-12 | In the last 4 weeks, how often have you been 'calm and relaxed'?                 |
| 30 |  | <i>Full of energy</i><br><br>Always<br>Mostly                                                  | Self-reports: SF-12 | In the last 4 weeks, how often have you been 'full of energy'?                   |

|    |                      |                                                                                                                                                               |                     |                                                                                                      |
|----|----------------------|---------------------------------------------------------------------------------------------------------------------------------------------------------------|---------------------|------------------------------------------------------------------------------------------------------|
|    |                      | Quite often<br>Sometimes<br>Rarely<br>Never                                                                                                                   |                     |                                                                                                      |
| 31 |                      | <i>Discouraged and sad</i><br><br>Always<br>Mostly<br>Quite often<br>Sometimes<br>Rarely<br>Never                                                             | Self-reports: SF-12 | In the last 4 weeks, how often have you been ‘discouraged and sad’?                                  |
| 32 |                      | <i>Frequency of influence of health problems on social contact</i><br><br>Always<br>Mostly<br>Quite often<br>Sometimes<br>Rarely<br>Never                     | Self-reports: SF-12 | In the last 4 weeks, how often no normal contact to other people due to physical or mental problems? |
| 33 |                      | <i>Physical sum score</i>                                                                                                                                     | Self-reports: SF-12 | Standardized summarizing score based on variables no. 21 – 32 (Bullinger and Kirchberger, 1998)      |
| 34 |                      | <i>Mental sum score</i>                                                                                                                                       | Self-reports: SF-12 | Standardized summarizing score based on variable no. 21 – 32 (Bullinger and Kirchberger, 1998)       |
| 35 |                      | <i>Health mean score</i>                                                                                                                                      | Self-reports: SF-12 | Arithmetic mean of variables no. 33, 34                                                              |
| 36 | Socioeconomic status | <i>School graduation<sup>1</sup></i><br><br>Schüler/in<br>Von der Schule abgegangen<br>Hauptschulabschluss<br>Realschulabschluss<br>Polytechnische Oberschule | Self-reports        |                                                                                                      |

<sup>1</sup> Response possibilities in German

|    |  |                                                                                                                                                                                                                                                                                                                                                                                                                                                                                                     |              |  |
|----|--|-----------------------------------------------------------------------------------------------------------------------------------------------------------------------------------------------------------------------------------------------------------------------------------------------------------------------------------------------------------------------------------------------------------------------------------------------------------------------------------------------------|--------------|--|
|    |  | der DDR mit Abschluss der<br>8. oder 9.Klasse<br>Polytechnische Oberschule<br>der DDR mit Abschluss der<br>10. Klasse<br>Fachhochschulreife<br>Abitur<br>Abitur über zweiten<br>Bildungsweg<br>Anderen Schulabschluss                                                                                                                                                                                                                                                                               |              |  |
| 37 |  | <i>Professional degree<sup>1</sup></i><br><br>Noch in Ausbildung<br>Schüler/in berufsorientierter<br>Aufbau-/Fachschule<br>Keinen beruflichen<br>Abschluss<br>Beruflich-betriebliche<br>Ausbildung abgeschlossen<br>Beruflich-schulische<br>Ausbildung abgeschlossen<br>Ausbildung an Fachschule in<br>DDR abgeschlossen<br>Ausbildung an einer Fach-,<br>Meister-, Technikerschule<br>Bachelor<br>Fachhochschulabschluss<br>Universitätsabschluss<br>Promotion<br>Anderen beruflichen<br>Abschluss | Self-reports |  |
| 38 |  | <i>Main professional<br/> occupation<sup>2</sup></i>                                                                                                                                                                                                                                                                                                                                                                                                                                                | Self-reports |  |

<sup>2</sup> Response possibilities in German

|  |  |                                                                                                                                                                                                                                                                                                                                                                                                                                                                                                                                                                                                                                                                                                                                                                                                                                                                                                                                                                                              |  |  |
|--|--|----------------------------------------------------------------------------------------------------------------------------------------------------------------------------------------------------------------------------------------------------------------------------------------------------------------------------------------------------------------------------------------------------------------------------------------------------------------------------------------------------------------------------------------------------------------------------------------------------------------------------------------------------------------------------------------------------------------------------------------------------------------------------------------------------------------------------------------------------------------------------------------------------------------------------------------------------------------------------------------------|--|--|
|  |  | <p>Schüler / Student /<br/>arbeitssuchend</p> <p>Selbstständige/r Landwirt/in,<br/>genutzte Fläche unter 10ha</p> <p>Selbstständige/r Landwirt/in,<br/>genutzte Fläche 10 und mehr<br/>ha</p> <p>Genossenschaftsbauer</p> <p>Akademiker, keine<br/>Mitarbeiter</p> <p>Akademiker, bis 4<br/>Mitarbeiter</p> <p>Akademiker, 5 und mehr<br/>Mitarbeiter</p> <p>Selbstständig im Handel,<br/>keine Mitarbeiter</p> <p>Selbstständig im Handel, 1-4<br/>Mitarbeiter</p> <p>Selbstständig im Handel, 5<br/>und mehr Mitarbeiter</p> <p>PGH-Mitglied</p> <p>Beamter/Beamtin, einfacher<br/>Dienst</p> <p>Beamter/Beamtin, mittlerer<br/>Dienst</p> <p>Beamter/Beamtin, gehobener<br/>Dienst</p> <p>Beamter/Beamtin, im<br/>höheren Dienst</p> <p>Angestellte/r, ausführende<br/>Tätigkeit nach Anweisung</p> <p>Angestellte/r, qualifizierte<br/>Tätigkeit nach Anweisung</p> <p>Angestellte/r, eigenständige<br/>Leistung mit<br/>verantwortlicher Tätigkeit</p> <p>Angestellte/r, umfassende</p> |  |  |
|--|--|----------------------------------------------------------------------------------------------------------------------------------------------------------------------------------------------------------------------------------------------------------------------------------------------------------------------------------------------------------------------------------------------------------------------------------------------------------------------------------------------------------------------------------------------------------------------------------------------------------------------------------------------------------------------------------------------------------------------------------------------------------------------------------------------------------------------------------------------------------------------------------------------------------------------------------------------------------------------------------------------|--|--|

|    |                                                         |                                                                                                                                                                                                                           |                                     |                                                                                                                                                                    |
|----|---------------------------------------------------------|---------------------------------------------------------------------------------------------------------------------------------------------------------------------------------------------------------------------------|-------------------------------------|--------------------------------------------------------------------------------------------------------------------------------------------------------------------|
|    |                                                         | Führungsaufgaben<br>Arbeiter/in, ungelernt<br>Arbeiter/in, angelernt<br>Facharbeiter<br>Vorarbeiter<br>Meister<br>Mithelfende/r<br>Familienangehörige/r                                                                   |                                     |                                                                                                                                                                    |
| 39 |                                                         | <i>Net income per household</i><br><br>No information<br>< 1.250 Euro<br>1.250 - 1.750 Euro<br>1.750 - 2.250 Euro<br>2.250 - 3.000 Euro<br>3.000 - 4.000 Euro<br>4.000 - 5.000 Euro<br>5.000 - 6.000 Euro<br>> 6.000 Euro | Self-reports                        |                                                                                                                                                                    |
| 40 |                                                         | <i>Socioeconomic status sum score</i>                                                                                                                                                                                     | Self-reports                        | Sum of three indices <i>Job</i> , <i>Education</i> , and <i>Income</i> that are calculated according to Winkler and Stolzenberg (2009) using variables no. 36 – 39 |
| 41 | Technology commitment and usage habits of media devices | <i>Overstrained with new technology</i><br><br>Strongly disagree = 5<br>Disagree = 4<br>Partly agree = 3<br>Agree = 2<br>Strongly agree = 1                                                                               | Self-reports: technology competence | I often feel overstrained with dealing with new technological developments                                                                                         |
| 42 |                                                         | <i>Dealing with new technology is difficult</i><br><br>Strongly disagree = 5<br>Disagree = 4<br>Partly agree = 3<br>Agree = 2                                                                                             | Self-reports: technology competence | Dealing with new technology is difficult for me – I'm unable most of the times                                                                                     |



|    |  |                                                                                                                                                      |                                     |                                                                                                                                                                                                                                                                                                                                                                                                                                                         |
|----|--|------------------------------------------------------------------------------------------------------------------------------------------------------|-------------------------------------|---------------------------------------------------------------------------------------------------------------------------------------------------------------------------------------------------------------------------------------------------------------------------------------------------------------------------------------------------------------------------------------------------------------------------------------------------------|
|    |  | Strongly agree = 1                                                                                                                                   |                                     |                                                                                                                                                                                                                                                                                                                                                                                                                                                         |
| 43 |  | <i>Afraid to fail with new technology</i><br><br>Strongly disagree = 5<br>Disagree = 4<br>Partly agree = 3<br>Agree = 2<br>Strongly agree = 1        | Self-reports: technology competence | I'm often afraid to fail when dealing with modern technology                                                                                                                                                                                                                                                                                                                                                                                            |
| 44 |  | <i>Afraid of breaking new technical products</i><br><br>Strongly disagree = 5<br>Disagree = 4<br>Partly agree = 3<br>Agree = 2<br>Strongly agree = 1 | Self-reports: technology competence | I'm rather afraid of breaking new technological developments instead of using                                                                                                                                                                                                                                                                                                                                                                           |
| 45 |  | <i>Technology competence</i>                                                                                                                         | Self-reports: technology competence | For Figure 6, first, absolute frequencies per response category were counted and summed up across the variables no. 41 – 44 for both HA-NU and HA-U. Then relative frequencies were determined. Response categories 1 – 5 of variables no. 41 – 44 refer to the categories <i>Not at all – A lot</i> of variable <i>Technology competence</i> in Figure 6. According to Neyer et al. (2012) technology competence is assessed by variables no. 41 – 44. |
| 46 |  | <i>Curious about new technology</i><br><br>Strongly disagree = 1<br>Disagree = 2<br>Partly agree = 3<br>Agree = 4<br>Strongly agree = 5              | Self-reports: technology acceptance | I'm very curious about new technological developments                                                                                                                                                                                                                                                                                                                                                                                                   |
| 47 |  | <i>Interested in using new technology</i><br><br>Strongly disagree = 1<br>Disagree = 2                                                               | Self-reports: technology acceptance | I'm always interested in using newest technical devices                                                                                                                                                                                                                                                                                                                                                                                                 |

|    |  |                                                                                                                                                            |                                     |                                                                                                                                                                                                                                                                                                                                                                                                                                                         |
|----|--|------------------------------------------------------------------------------------------------------------------------------------------------------------|-------------------------------------|---------------------------------------------------------------------------------------------------------------------------------------------------------------------------------------------------------------------------------------------------------------------------------------------------------------------------------------------------------------------------------------------------------------------------------------------------------|
|    |  | Partly agree = 3<br>Agree = 4<br>Strongly agree = 5                                                                                                        |                                     |                                                                                                                                                                                                                                                                                                                                                                                                                                                         |
| 48 |  | <i>Would like to use technical products more often</i><br><br>Strongly disagree = 1<br>Disagree = 2<br>Partly agree = 3<br>Agree = 4<br>Strongly agree = 5 | Self-reports: technology acceptance | I would use technical products much more often if I had the opportunity                                                                                                                                                                                                                                                                                                                                                                                 |
| 49 |  | <i>Quickly take a shine to new technology</i><br><br>Strongly disagree = 1<br>Disagree = 2<br>Partly agree = 3<br>Agree = 4<br>Strongly agree = 5          | Self-reports: technology acceptance | I quickly take a shine to new technological developments                                                                                                                                                                                                                                                                                                                                                                                                |
| 50 |  | <i>Technology acceptance</i>                                                                                                                               | Self-reports: technology acceptance | For Figure 6, first, absolute frequencies per response category were counted and summed up across the variables no. 46 – 49 for both HA-NU and HA-U. Then relative frequencies were determined. Response categories 1 – 5 of variables no. 46 – 49 refer to the categories <i>Not at all – A lot</i> of variable <i>Technology acceptance</i> in Figure 6. According to Neyer et al. (2012) technology acceptance is assessed by variables no. 46 – 49. |
| 51 |  | <i>Successful use is up to me</i><br><br>Strongly disagree = 1<br>Disagree = 2<br>Partly agree = 3<br>Agree = 4<br>Strongly agree = 5                      | Self-reports: technology control    | It is in my hand whether the use of new technological developments succeeds                                                                                                                                                                                                                                                                                                                                                                             |
| 52 |  | <i>Solving difficulties depends on me</i><br><br>Strongly disagree = 1                                                                                     | Self-reports: technology control    | Solving difficulties in dealing with technology depends on me                                                                                                                                                                                                                                                                                                                                                                                           |

|    |  |                                                                                                                                          |                                             |                                                                                                                                                                                                                                                                                                                                                                                                                                                   |
|----|--|------------------------------------------------------------------------------------------------------------------------------------------|---------------------------------------------|---------------------------------------------------------------------------------------------------------------------------------------------------------------------------------------------------------------------------------------------------------------------------------------------------------------------------------------------------------------------------------------------------------------------------------------------------|
|    |  | Disagree = 2<br>Partly agree = 3<br>Agree = 4<br>Strongly agree = 5                                                                      |                                             |                                                                                                                                                                                                                                                                                                                                                                                                                                                   |
| 53 |  | <i>What happens is in my control</i><br><br>Strongly disagree = 1<br>Disagree = 2<br>Partly agree = 3<br>Agree = 4<br>Strongly agree = 5 | Self-reports: technology control            | It is in my control what happens when I work with new technological developments                                                                                                                                                                                                                                                                                                                                                                  |
| 54 |  | <i>Success depends on me</i><br><br>Strongly disagree = 1<br>Disagree = 2<br>Partly agree = 3<br>Agree = 4<br>Strongly agree = 5         | Self-reports: technology control            | Success in dealing with modern technology depends on me                                                                                                                                                                                                                                                                                                                                                                                           |
| 55 |  | <i>Technology control</i>                                                                                                                | Self-reports: technology control            | For Figure 6, first, absolute frequencies per response category were counted and summed up across the variables no. 51 – 54 for both HA-NU and HA-U. Then relative frequencies were determined. Response categories 1 – 5 of variables no. 51 – 54 refer to the categories <i>Not at all – A lot</i> of variable <i>Technology control</i> in Figure 6. According to Neyer et al. (2012) technology control is assessed by variables no. 51 – 54. |
| 56 |  | <i>Technology commitment mean score</i>                                                                                                  | Self-reports: technology commitment         | First, mean values of variables no. 41– 44, 46 – 49, and 51– 54 were calculated. Then the arithmetic mean was calculated based on those three variables.                                                                                                                                                                                                                                                                                          |
| 57 |  | <i>Frequency of using a PC/notebook</i><br><br>No usage<br>Less than once per month<br>Once or more monthly<br>Once or more weekly       | Self-reports: usage habits of media devices | Do you use a PC/notebook and if yes, how often?                                                                                                                                                                                                                                                                                                                                                                                                   |

|    |  |                                                                                                                                                         |                                             |                                                 |
|----|--|---------------------------------------------------------------------------------------------------------------------------------------------------------|---------------------------------------------|-------------------------------------------------|
|    |  | Once or more daily                                                                                                                                      |                                             |                                                 |
| 58 |  | <i>Frequency of using a tablet</i><br><br>No usage<br>Less than once per month<br>Once or more monthly<br>Once or more weekly<br>Once or more daily     | Self-reports: usage habits of media devices | Do you use a tablet and if yes, how often?      |
| 59 |  | <i>Frequency of using a MP3 player</i><br><br>No usage<br>Less than once per month<br>Once or more monthly<br>Once or more weekly<br>Once or more daily | Self-reports: usage habits of media devices | Do you use a MP3 player and if yes, how often?  |
| 60 |  | <i>Frequency of writing E-mails</i><br><br>No usage<br>Less than once per month<br>Once or more monthly<br>Once or more weekly<br>Once or more daily    | Self-reports: usage habits of media devices | Do you write E-mails and if yes, how often?     |
| 61 |  | <i>Frequency of using the Internet</i><br><br>No usage<br>Less than once per month<br>Once or more monthly<br>Once or more weekly<br>Once or more daily | Self-reports: usage habits of media devices | Do you use the Internet and if yes, how often?  |
| 62 |  | <i>Frequency of using a fixed phone</i><br><br>No usage<br>Less than once per month                                                                     | Self-reports: usage habits of media devices | Do you use a fixed phone and if yes, how often? |

|    |  |                                                                                                                                                                            |                                             |                                                                   |
|----|--|----------------------------------------------------------------------------------------------------------------------------------------------------------------------------|---------------------------------------------|-------------------------------------------------------------------|
|    |  | Once or more monthly<br>Once or more weekly<br>Once or more daily                                                                                                          |                                             |                                                                   |
| 63 |  | <i>Frequency of using a smartphone</i><br><br>No usage<br>Less than once per month<br>Once or more monthly<br>Once or more weekly<br>Once or more daily                    | Self-reports: usage habits of media devices | Do you use a smartphone and if yes, how often?                    |
| 64 |  | <i>Frequency of using a mobile phone without Internet</i><br><br>No usage<br>Less than once per month<br>Once or more monthly<br>Once or more weekly<br>Once or more daily | Self-reports: usage habits of media devices | Do you use a mobile phone without Internet and if yes, how often? |
| 65 |  | <i>Usage habits sum score</i>                                                                                                                                              | Self-reports: usage habits of media devices | Sum of variables no. 57 – 64                                      |

**Supplementary Table S2. Health status of HA-NU and HA-U.** Shown are percentages across the different response categories of the health questions.

| Health questions                                        | Response categories               | HA-NU           | HA-U            |
|---------------------------------------------------------|-----------------------------------|-----------------|-----------------|
|                                                         |                                   | Percentages (%) | Percentages (%) |
| <i>State of health in general</i>                       | <i>Excellent</i>                  | 4.4             | 5.4             |
|                                                         | <i>Very good</i>                  | 17.7            | 14.5            |
|                                                         | <i>Good</i>                       | 50.6            | 74.5            |
|                                                         | <i>Not so well</i>                | 24.1            | 3.4             |
|                                                         | <i>Bad</i>                        | 3.3             | 2.2             |
| <i>Impairment at vacuum cleaning</i>                    | <i>Yes, strongly impaired</i>     | 5.0             | 0.0             |
|                                                         | <i>Yes, a little impaired</i>     | 37.5            | 27.2            |
|                                                         | <i>No, not impaired at all</i>    | 57.5            | 72.9            |
| <i>Impairment at taking several sets of stairs</i>      | <i>Yes, strongly impaired</i>     | 5.5             | 0.0             |
|                                                         | <i>Yes, a little impaired</i>     | 44.2            | 29.7            |
|                                                         | <i>No, not impaired at all</i>    | 49.8            | 70.3            |
|                                                         | <i>Missing values<sup>1</sup></i> | 0.6             | 0.0             |
| <i>Less accomplished due to physical health</i>         | <i>Yes</i>                        | 30.9            | 27.4            |
|                                                         | <i>No</i>                         | 69.1            | 72.6            |
| <i>Doing only certain things due to physical health</i> | <i>Yes</i>                        | 26.2            | 17.9            |
|                                                         | <i>No</i>                         | 72.7            | 79.9            |
|                                                         | <i>Missing values<sup>1</sup></i> | 1.1             | 2.2             |
| <i>Less accomplished due to mental</i>                  | <i>Yes</i>                        | 22.4            | 8.0             |

|                                                  |                                   |      |      |
|--------------------------------------------------|-----------------------------------|------|------|
| <b><i>health</i></b>                             | <i>No</i>                         | 77.6 | 92.1 |
| <b><i>Less accurate due to mental health</i></b> | <i>Yes</i>                        | 16.5 | 8.3  |
|                                                  | <i>No</i>                         | 83.6 | 91.7 |
| <b><i>Influence of pain</i></b>                  | <i>Not at all</i>                 | 44.5 | 49.2 |
|                                                  | <i>A little</i>                   | 28.3 | 30.2 |
|                                                  | <i>Moderate</i>                   | 15.0 | 15.7 |
|                                                  | <i>Quite</i>                      | 11.2 | 4.9  |
|                                                  | <i>A lot</i>                      | 1.1  | 0.0  |
| <b><i>Calm and relaxed</i></b>                   | <i>Always</i>                     | 9.2  | 14.4 |
|                                                  | <i>Mostly</i>                     | 51.8 | 59.9 |
|                                                  | <i>Quite often</i>                | 19.3 | 16.0 |
|                                                  | <i>Sometimes</i>                  | 8.3  | 9.7  |
|                                                  | <i>Rarely</i>                     | 9.5  | 0.0  |
|                                                  | <i>Never</i>                      | 2.0  | 0.0  |
| <b><i>Full of energy</i></b>                     | <i>Always</i>                     | 4.0  | 5.5  |
|                                                  | <i>Mostly</i>                     | 21.0 | 31.9 |
|                                                  | <i>Quite often</i>                | 33.9 | 38.3 |
|                                                  | <i>Sometimes</i>                  | 17.6 | 18.0 |
|                                                  | <i>Rarely</i>                     | 21.4 | 6.3  |
|                                                  | <i>Never</i>                      | 0.0  | 0.0  |
|                                                  | <i>Missing values<sup>1</sup></i> | 2.2  | 0.0  |
| <b><i>Discouraged and sad</i></b>                | <i>Always</i>                     | 2.2  | 0.0  |
|                                                  | <i>Mostly</i>                     | 4.2  | 0.0  |
|                                                  | <i>Quite often</i>                | 3.2  | 1.2  |
|                                                  | <i>Sometimes</i>                  | 19.8 | 12.7 |

|                                                                           |                                   |      |      |
|---------------------------------------------------------------------------|-----------------------------------|------|------|
|                                                                           | <i>Rarely</i>                     | 37.3 | 46.4 |
|                                                                           | <i>Never</i>                      | 31.0 | 39.7 |
|                                                                           | <i>Missing values<sup>1</sup></i> | 2.2  | 0.0  |
| <b><i>Frequency of influence of health problems on social contact</i></b> | <i>Always</i>                     | 0.0  | 0.0  |
|                                                                           | <i>Mostly</i>                     | 4.2  | 0.0  |
|                                                                           | <i>Quite often</i>                | 17.8 | 11.0 |
|                                                                           | <i>Sometimes</i>                  | 26.7 | 25.6 |
|                                                                           | <i>Rarely</i>                     | 51.3 | 63.4 |
|                                                                           | <i>Never</i>                      | 0.0  | 0.0  |

Note: Because of rounding percentages may add up to more or less than 100%.

<sup>1</sup>The category “Missing values” is listed only when at least one missing value occurs in HA-NU or HA-U.



**Supplementary Figure S3. Frequency distributions of the single questions assessing the socioeconomic status among HA-NU and HA-U.** Figure S3 shows relative frequency distributions of the four measures *School graduation*, *Professional degree*, *Main professional occupation*, and *Net income per household*. Here, the response categories are listed in German.

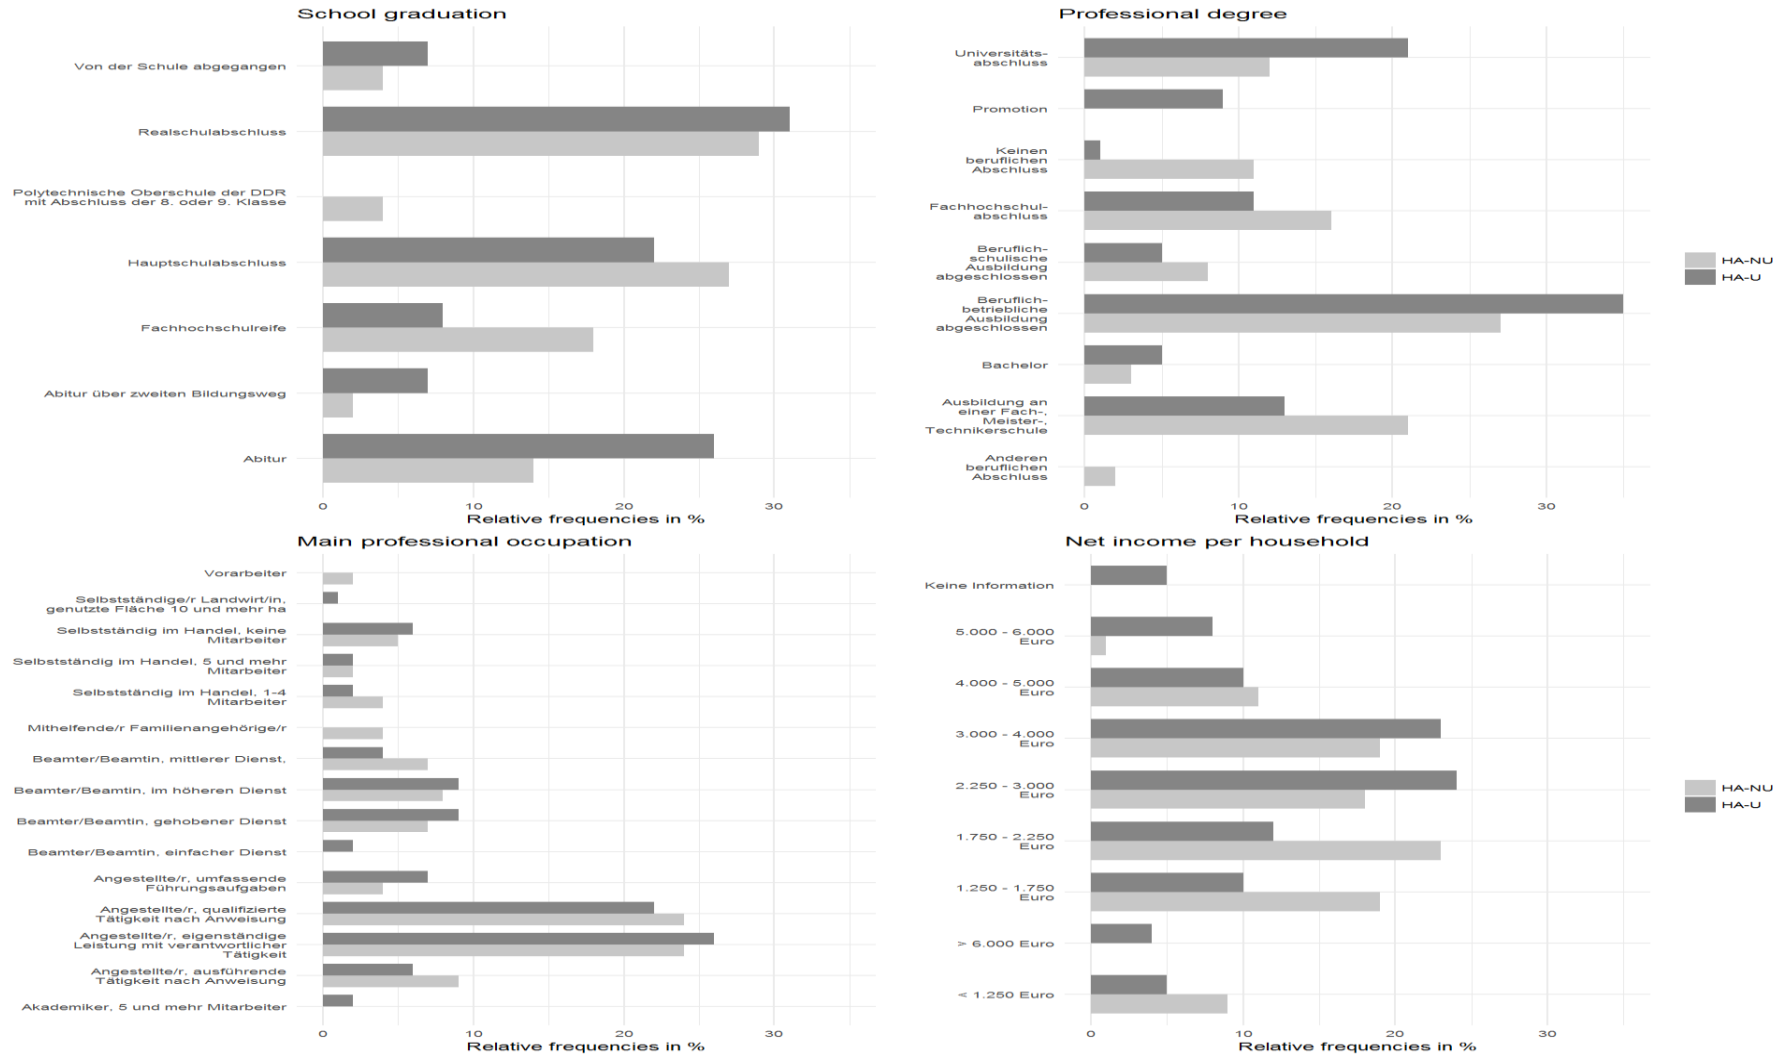

**Supplementary Figure S4. Frequency distributions of the 12 single items assessing the technology commitment among HA-NU and HA-U.** Figure S4 shows relative frequency distributions of the four questions addressing *Technology competence* (four upper panels), *Technology acceptance* (four middle panels), and *Technology control* (four bottom panels).

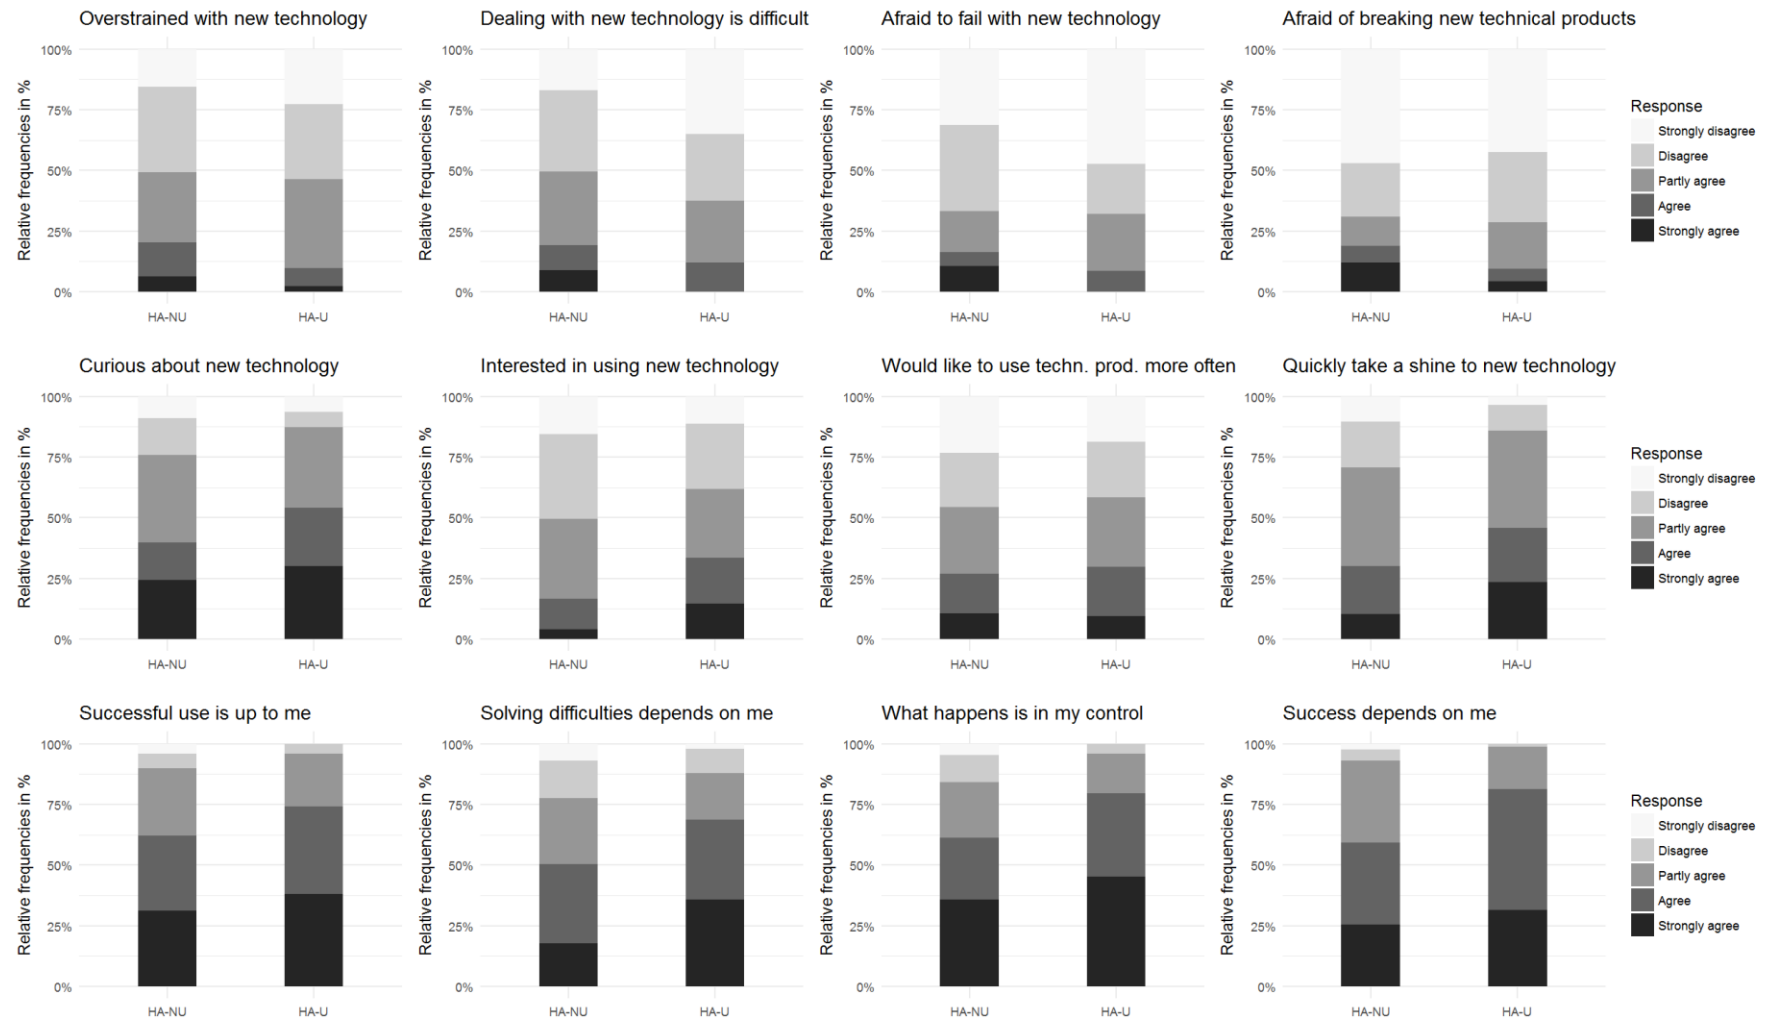

**Supplementary Figure S5. Frequency distributions of the eight self-reports assessing the usage habits of media devices among HA-NU and HA-U.** Figure S5 shows relative frequency distributions of the frequency of using a PC or notebook, tablet, mp3 player, writing emails, using the internet, using a fixed phone, smartphone, and a mobile phone without internet.

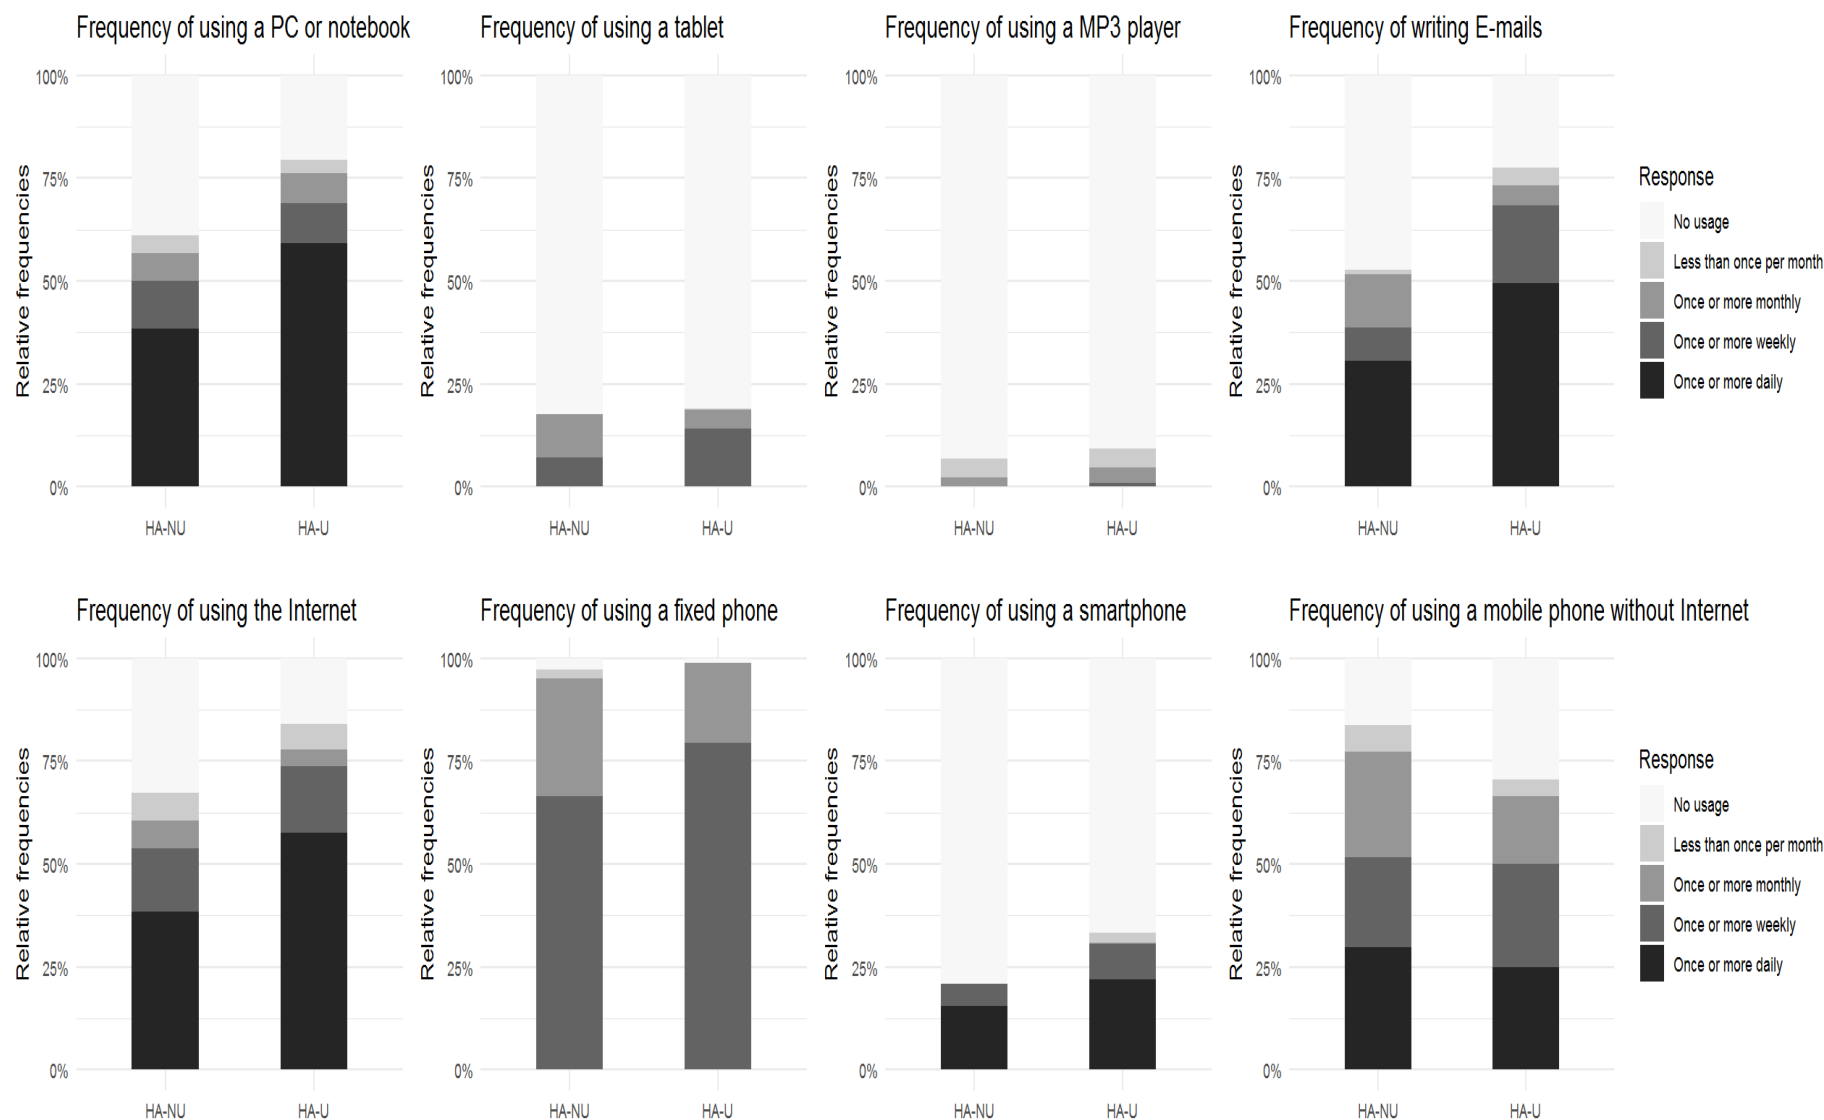

Supplement: Supplementary file 1 [file 13612289]
